# Supplementary material for: Compulsivity Reveals a Novel Dissociation between Action and Confidence
Source: PubMed Central journal article supplement (PMC5643443; doi:10.1016/j.neuron.2017.09.006), 2017-10-11
Supplement: mmc1.pdf [file mmc1.pdf]

**Neuron, Volume 96**

**Supplemental Information**

**Compulsivity Reveals a Novel Dissociation  
between Action and Confidence**

**Matilde M. Vaghi, Fabrice Luyckx, Akeem Sule, Naomi A. Fineberg, Trevor W. Robbins, and Benedetto De Martino**

## Supplementary Material

**Table S1. Demographic and Clinical Characteristics of the Participants Included in the Study. Related to STAR Methods.**

|                    | Controls      | OCD Patients  |                      |             |
|--------------------|---------------|---------------|----------------------|-------------|
| Gender (M:F)       | 13:12         | 13:11         | $\chi^2_{1} = 0.023$ | $p = 0.879$ |
| Age                | 40.68 (10.19) | 41.33 (12.32) | $t_{47} = -0.203$    | $p = 0.840$ |
| Verbal IQ          | 117.92 (3.97) | 116.32 (2.99) | $t_{46} = 1.568$     | $p = 0.124$ |
| MADRS              | 1.36 (2.02)   | 9.92 (4.36)   | $t_{47} = -8.870$    | $p < 0.001$ |
| OCI-R              | 7.64 (6.37)   | 29.25 (11.87) | $t_{47} = -7.984$    | $p < 0.001$ |
| STAI-State         | 28.90 (7.06)  | 43.50 (10.72) | $t_{47} = -5.496$    | $p < 0.001$ |
| STAI-Trait         | 35.00 (7.01)  | 56.58 (7.91)  | $t_{47} = -10.120$   | $p < 0.001$ |
| Y-BOCS Total       | -             | 22.75 (4.32)  |                      |             |
| Y-BOCS Obsessions  | -             | 10.79 (2.41)  |                      |             |
| Y-BOCS Compulsions | -             | 11.96 (2.23)  |                      |             |

Mean values are reported and standard deviation in brackets.

**Table S2. List of Quantiles for Error Magnitude and Values of Learning Rate for Each Quantile. Related to Figure 2B.**

| Quantile | Boundaries<br>quantiles | CTL   |         | OCD   |         |
|----------|-------------------------|-------|---------|-------|---------|
|          |                         | Mean  | (SEM)   | Mean  | (SEM)   |
| 1        | [1-2)                   | 0.000 | (0.00)  | 0.088 | (0.053) |
| 2        | [2-3)                   | 0.010 | (0.017) | 0.281 | (0.082) |
| 3        | [3-4)                   | 0.038 | (0.032) | 0.357 | (0.142) |
| 4        | [4-5)                   | 0.052 | (0.034) | 0.334 | (0.114) |
| 5        | [5-7)                   | 0.075 | (0.038) | 0.342 | (0.094) |
| 6        | [7-8)                   | 0.110 | (0.049) | 0.376 | (0.097) |
| 7        | [8-9)                   | 0.106 | (0.055) | 0.334 | (0.090) |
| 8        | [9-11)                  | 0.112 | (0.034) | 0.352 | (0.083) |
| 9        | [11-12)                 | 0.121 | (0.042) | 0.366 | (0.090) |
| 10       | [12-13)                 | 0.154 | (0.055) | 0.370 | (0.087) |
| 11       | [13-15)                 | 0.184 | (0.042) | 0.420 | (0.077) |
| 12       | [15-17)                 | 0.225 | (0.049) | 0.455 | (0.077) |
| 13       | [17-19)                 | 0.288 | (0.044) | 0.506 | (0.063) |

|           |           |       |         |       |         |
|-----------|-----------|-------|---------|-------|---------|
| <b>14</b> | [19-22)   | 0.402 | (0.043) | 0.588 | (0.047) |
| <b>15</b> | [22-25)   | 0.484 | (0.044) | 0.689 | (0.041) |
| <b>16</b> | [25-29)   | 0.521 | (0.043) | 0.731 | (0.036) |
| <b>17</b> | [29-37)   | 0.632 | (0.045) | 0.826 | (0.040) |
| <b>18</b> | [37-66)   | 0.764 | (0.037) | 0.917 | (0.035) |
| <b>19</b> | [66-125)  | 0.917 | (0.020) | 0.929 | (0.019) |
| <b>20</b> | [125-180) | 0.883 | (0.021) | 0.927 | (0.019) |

For values presented in Figure 2B the distribution of the values of the spatial prediction error (i.e.,  $\hat{\delta}_t = X_t - b_t$ , Equation 2) was divided in 20 quantiles. The table displays boundaries of each quantile, and associated mean (and SEM in brackets) of the learning rate ( $\hat{\alpha}$ ) for controls and OCD patients.

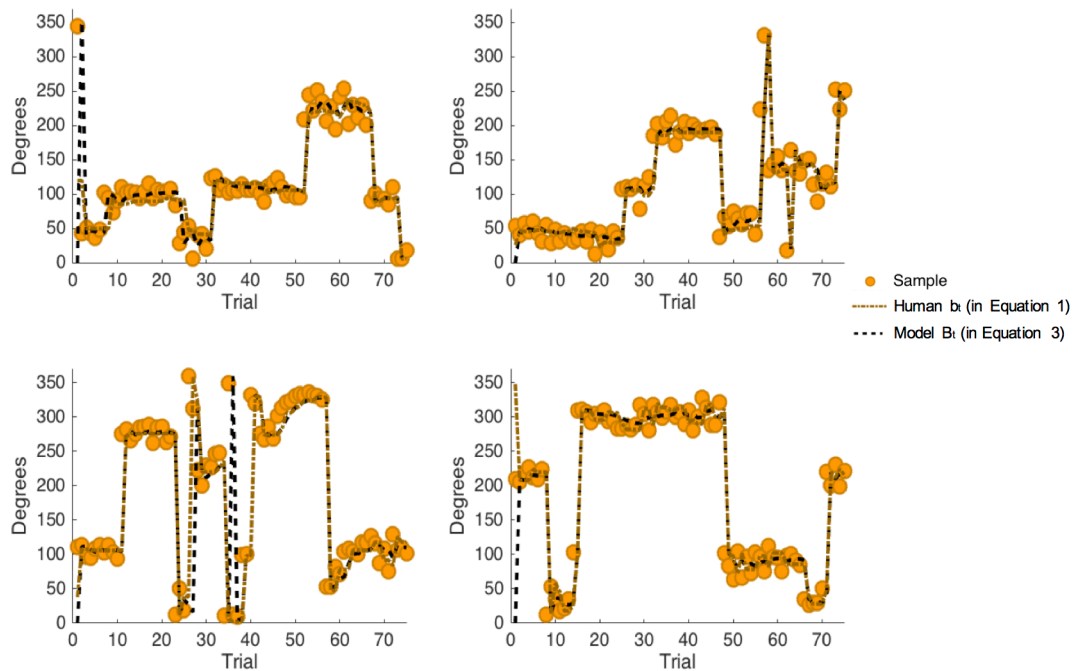

**Figure S1. Comparison Between Human Participants and Model. Related to Figure 3B.**

Comparison was performed at the trial-by-trial level between subject's bucket position  $b_t$  computed in Equation 1 and model term  $B_t$  computed with Equation 3. Orange data points mark the location at which successive particles landed. The black dashed line marks the prediction of a quasi-optimal Bayesian model (i.e.,  $B_t$  model belief update computed according to Equation 3,  $B_{t+1} = B_t + \alpha_t \times \delta_t$ ). The brown dashed line marks the bucket's position (i.e.,  $b_t$  in Equation 1 where participant positioned the bucket from one trial to the

next). Data are shown for one representative control subject. Each panel represents an experimental run of 75 trials.

**Table S3. Summary of Parameters Obtained from the Regression Model for Action and Confidence<sup>a</sup>. Related to Figures 3C and 3F.**

|                   | Group | Beta   | SEM   | Within groups comparison |         |        | Between groups comparison |          |       |
|-------------------|-------|--------|-------|--------------------------|---------|--------|---------------------------|----------|-------|
|                   |       |        |       | Stat                     | p       |        | z                         | Rank sum | p     |
| <b>Action</b>     |       |        |       |                          |         |        |                           |          |       |
| PE                | CTL   | 0.264  | 0.077 | t <sub>24</sub> =        | 3.422   | 0.002  | -2.370                    | 506      | 0.018 |
|                   | OCD   | 0.567  | 0.069 | t <sub>23</sub> =        | 8.197   | <0.001 |                           |          |       |
| CPP               | CTL   | 0.565  | 0.056 | t <sub>24</sub> =        | 10.076  | <0.001 | 2.530                     | 752      | 0.011 |
|                   | OCD   | 0.314  | 0.065 | t <sub>23</sub> =        | 4.856   | <0.001 |                           |          |       |
| MC                | CTL   | 0.856  | 0.191 | t <sub>24</sub> =        | 4.479   | <0.001 | 0                         | 625      | 1     |
|                   | OCD   | 0.632  | 0.130 | t <sub>23</sub> =        | 4.859   | <0.001 |                           |          |       |
| Hit/Missed        | CTL   | -0.742 | 0.053 | t <sub>24</sub> =        | -13.978 | <0.001 | 1.650                     | 708      | 0.098 |
|                   | OCD   | -0.863 | 0.052 | t <sub>23</sub> =        | -16.586 | <0.001 |                           |          |       |
| <b>Confidence</b> |       |        |       |                          |         |        |                           |          |       |
| PE                | CTL   | -0.061 | 0.034 | t <sub>24</sub> =        | -1.786  | 0.087  | 0.370                     | 644      | 0.711 |
|                   | OCD   | -0.060 | 0.039 | t <sub>23</sub> =        | -1.538  | 0.138  |                           |          |       |
| CPP               | CTL   | -0.205 | 0.059 | t <sub>24</sub> =        | -3.478  | 0.002  | -1.170                    | 566      | 0.242 |
|                   | OCD   | -0.107 | 0.049 | t <sub>23</sub> =        | -2.157  | 0.042  |                           |          |       |
| MC                | CTL   | -0.214 | 0.041 | t <sub>24</sub> =        | -5.281  | <0.001 | -1.230                    | 563      | 0.219 |
|                   | OCD   | -0.139 | 0.030 | t <sub>23</sub> =        | -4.642  | <0.001 |                           |          |       |
| Hit/Missed        | CTL   | 0.204  | 0.030 | t <sub>24</sub> =        | 6.854   | <0.001 | -0.330                    | 608      | 0.741 |
|                   | OCD   | 0.213  | 0.027 | t <sub>23</sub> =        | 7.832   | <0.001 |                           |          |       |

<sup>a</sup> PE, prediction error; CPP, change-point probability; MC, model confidence.

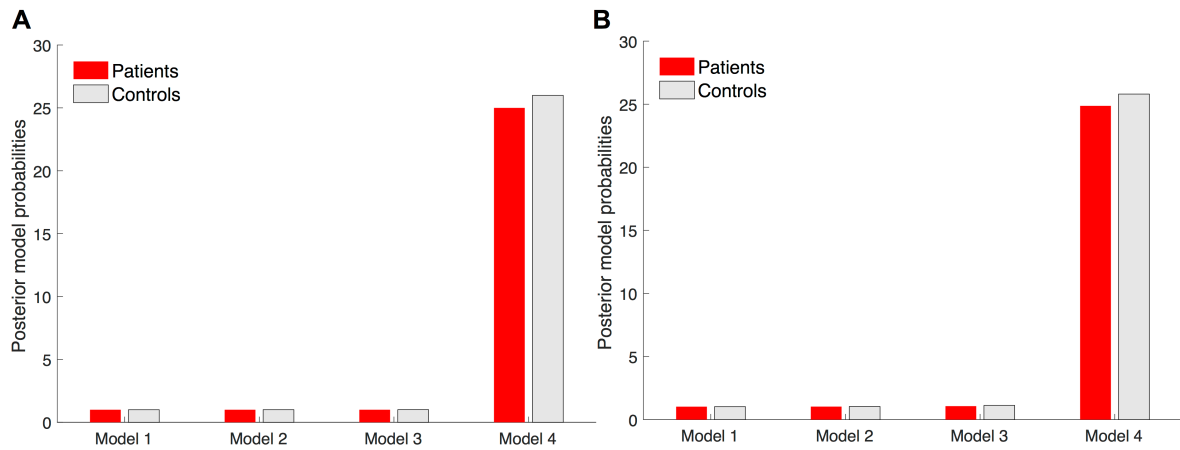

**Figure S2. Bayesian Model Selection. Related to STAR Methods. (A)** Posterior ‘action regression’ model probabilities after Bayesian model selection. The full and partial regression models predicting action were compared using the `spm_BMS` function (Stephan et al., 2009) from the SPM12 toolbox in Matlab (<http://www.fil.ion.ucl.ac.uk/spm/software/spm12/>). For both groups, the full regression model (Model 4, Table S4, Action) was deemed the most probable model. **(B)** Posterior ‘confidence regression’ model probabilities after Bayesian model selection. The best model to explain the data for both groups was again Model 4 (Table S4, Confidence), the full model with all four predictors included.

**Table S4. Formulae for Models Represented in Figure S2<sup>a</sup>. Related to STAR Methods.**

| <b>Models</b>     | <b>Formulae</b>                                                                                                                                                            |
|-------------------|----------------------------------------------------------------------------------------------------------------------------------------------------------------------------|
| <b>Action</b>     |                                                                                                                                                                            |
| <b>Model 1</b>    | Action $\sim \beta_0 + \beta_1[\text{Prediction error}] + \varepsilon$                                                                                                     |
| <b>Model 2</b>    | Action $\sim \beta_0 + \beta_1[\text{Prediction error}] + \beta_2[\text{CPP*PE}] + \varepsilon$                                                                            |
| <b>Model 3</b>    | Action $\sim \beta_0 + \beta_1[\text{Prediction error}] + \beta_2[\text{CPP*PE}] + \beta_3[(1-\text{CPP})*(1-\text{MC})*\text{PE}] + \varepsilon$                          |
| <b>Model 4</b>    | Action $\sim \beta_0 + \beta_1[\text{Prediction error}] + \beta_2[\text{CPP*PE}] + \beta_3[(1-\text{CPP})*(1-\text{MC})*\text{PE}] + \beta_4[\text{Hit*PE}] + \varepsilon$ |
| <b>Confidence</b> |                                                                                                                                                                            |
| <b>Model 1</b>    | Confidence $\sim \beta_0 + \beta_1[\text{Prediction error}] + \varepsilon$                                                                                                 |
| <b>Model 2</b>    | Confidence $\sim \beta_0 + \beta_1[\text{Prediction error}] + \beta_2[\text{CPP}] + \varepsilon$                                                                           |
| <b>Model 3</b>    | Confidence $\sim \beta_0 + \beta_1[\text{Prediction error}] + \beta_2[\text{CPP}] + \beta_3[(1-\text{CPP})*(1-\text{MC})] + \varepsilon$                                   |
| <b>Model 4</b>    | Confidence $\sim \beta_0 + \beta_1[\text{Prediction error}] + \beta_2[\text{CPP}] + \beta_3[(1-\text{CPP})*(1-\text{MC})] + \beta_4[\text{Hit}] + \varepsilon$             |

<sup>a</sup>PE, prediction error; CPP, change-point probability; MC, model confidence.

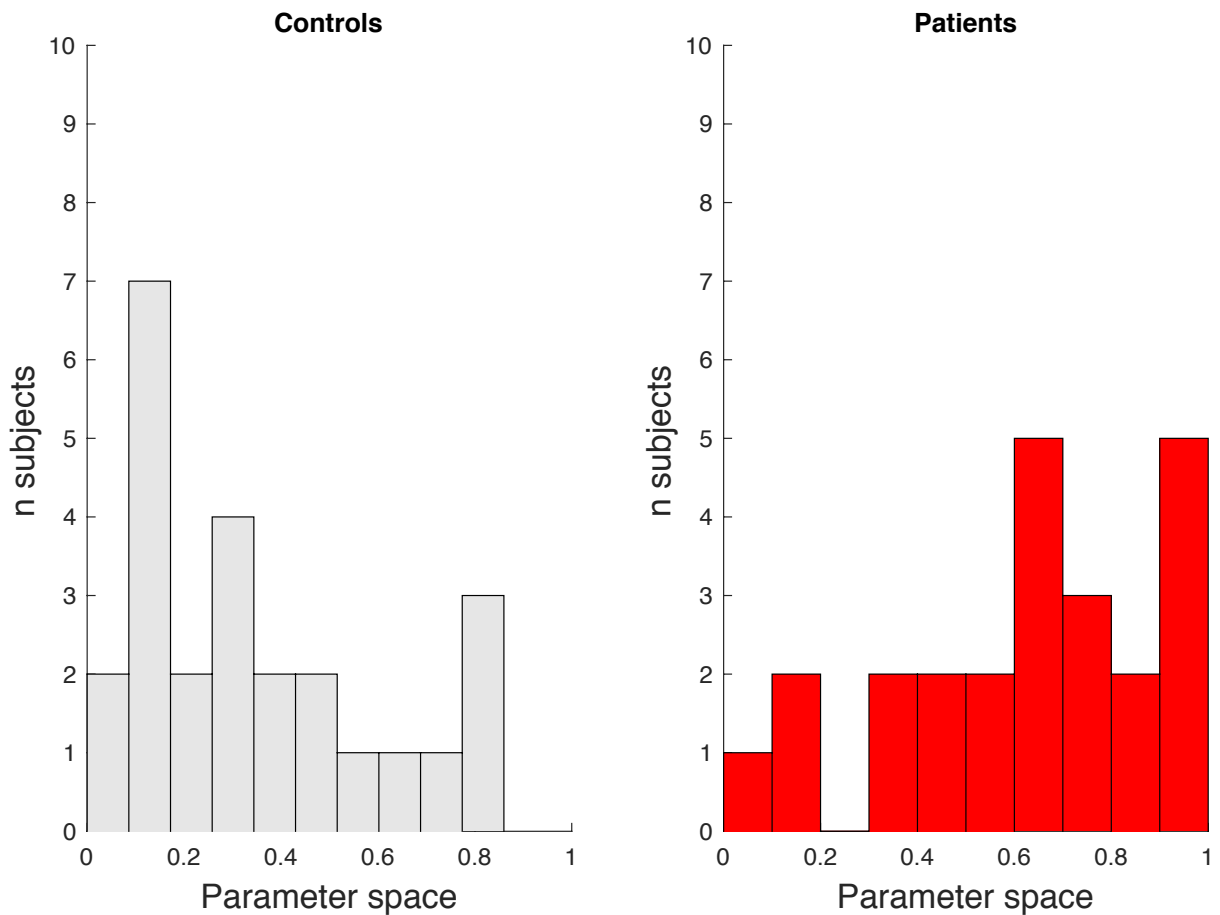

**Figure S3. Distribution of Fitted Hazard Rates for Each Group. Related to STAR Methods.** Model fits were obtained after an exhaustive search for possible values between 0 and 1. Best fitting parameters were determined by minimum least-squares fits between subject and model choices on each trial. The distribution of model fits showed a clear bimodal distribution, with overall higher hazard rate fits for patients (median = .62) compared to controls (median = .32, Wilcoxon rank-sum test,  $p = .007$ ). However, these results are not surprising, as hazard rate is highly correlated with learning rate (see Nassar et al., 2012). Furthermore, we did not include these fits in our main analyses as those focused on subjects' behavior compared to a benchmark Bayesian model.

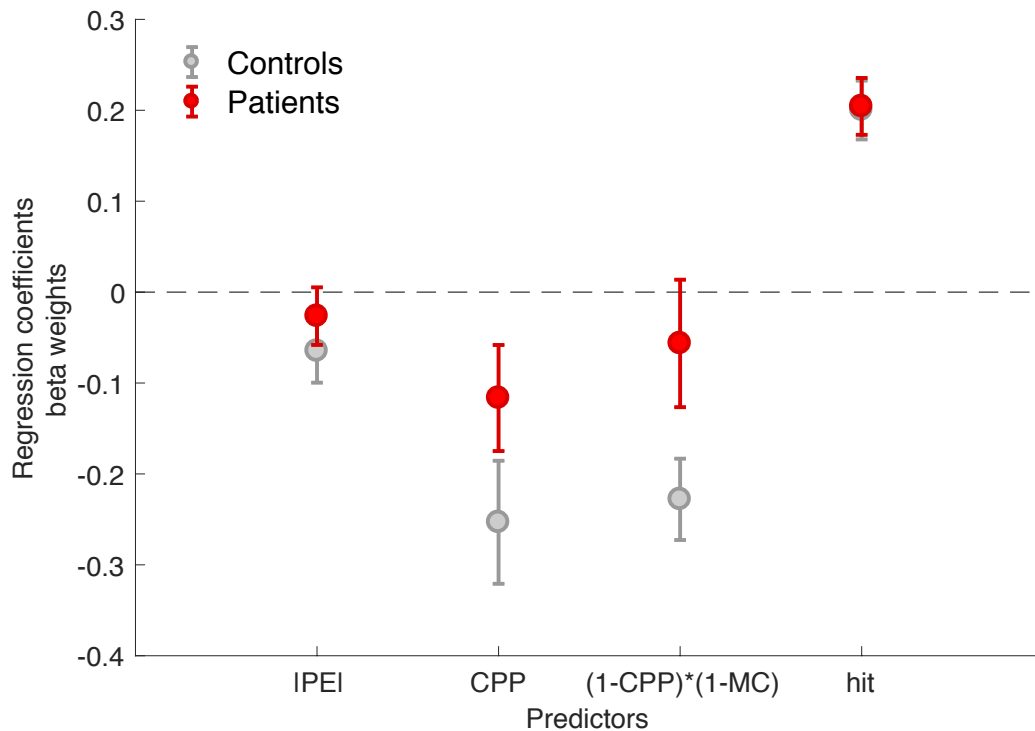

**Figure S4. Regression on Confidence for Model with Fitted Hazard Rate. Related to STAR Methods.** We ran an identical regression model as Figure 3F, with one change: model regressors CPP and (1-CPP)\*(1-MC) were no longer derived from the benchmark Bayesian model, but from the model with fitted hazard rate for each participant. Results showed that model confidence no longer predicted patients' confidence (MC: OCD,  $-0.06 \pm 0.07$ ,  $t_{19} = 0.79$ ,  $p = 0.44$ ), and this was significantly higher compared to controls (CTL,  $-0.23 \pm 0.04$ ; paired two-sided t-test,  $p = 0.04$ ). Error bars represent SEM. Note that four participants from the patient group were excluded from the analysis, as their hazard rate was close to 1, in which case the two model predictors are perfectly negatively correlated and the regression model cannot find good fits. This analysis provides a different way of showing the dissociation of action and confidence in the OCD group: when hazard rate is fitted to participants' action (i.e. bucket update) OCD behavior is fitted by higher hazard rate, in other words OCD actions were reflecting an increased *perceived* volatility in the environment. However, OCD confidence rating did not reflect this increased *perceived* volatility (estimated using the fitted model) but were more aligned with the actual level of volatility in the environment. This analysis might provide another indication that patients did indeed understand the properties of the environment, but failed to act upon them.
